# Supplementary material for: Sustainable Development of Magnetic Chitosan Core–Shell Network for the Removal of Organic Dyes from Aqueous Solutions
Source: MDPI journal article supplement (doi:10.3390/ma14247701), 2021-12-13
Supplement: s1 [file s1]

Supporting information

# Sustainable development of magnetic chitosan core-shell network for the removal of organic dyes in aqueous solutions

Karthik Rathinam<sup>1, \*</sup>, Xinwei Kou<sup>1</sup>, Ralph Hobby<sup>1</sup> and Stefan Panglisch<sup>1, 2, 3, 4, \*</sup>

<sup>1</sup> Chair for Mechanical Process Engineering / Water Technology, University of Duisburg-Essen, Duisburg, Germany

<sup>2</sup> IWW Water Centre, Mülheim an der Ruhr, Germany

<sup>3</sup> DGMT German Society for Membrane Technology e.V., Essen, Germany

<sup>4</sup> Centre for Water and Environmental Research (ZWU), Essen, Germany

\* Correspondence: karthik.rathinam@uni-due.de (K.R); stefan.panglisch@uni-due.de (S.P)

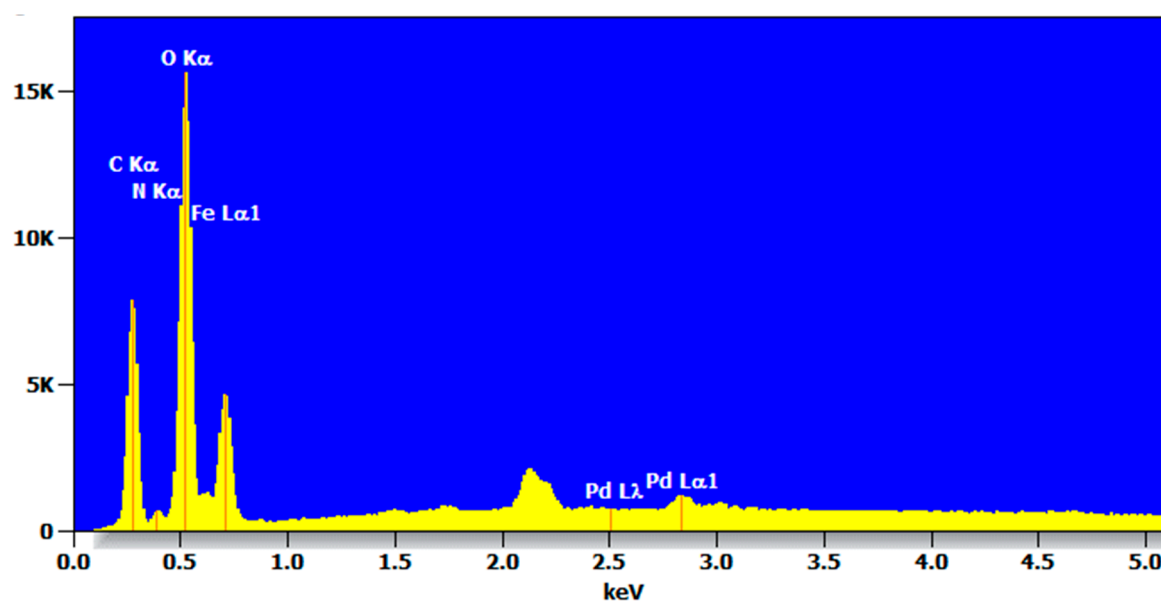

Figure S1. EDS spectra of MCN.

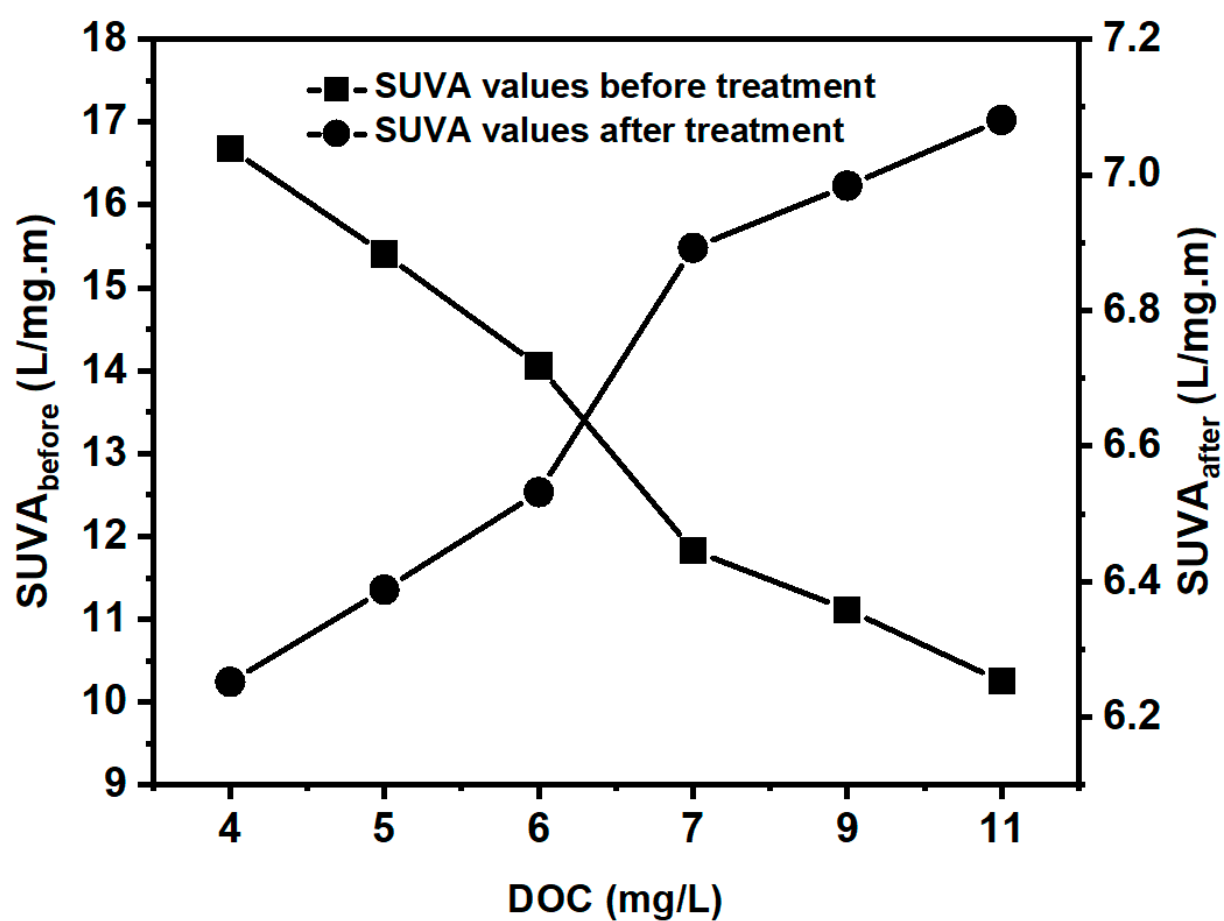

Figure S2. Comparison of SUVA values for waters with different DOC concentration (before and after treatment).
